# Supplementary material for: Full-length transcript sequencing accelerates the transcriptome research of Gymnocypris namensis, an iconic fish of the Tibetan Plateau
Source: PubMed Central journal article supplement (PMC7296019; doi:10.1038/s41598-020-66582-w), 2020-06-15
Supplement: 41598_2020_66582_MOESM1_ESM.pdf [file 41598_2020_66582_MOESM1_ESM.pdf]

## supplementary information:

### **Full-length transcript sequencing accelerates the transcriptome research of *Gymnocypris namensis*, an iconic fish of the Tibetan Plateau**

Hui Luo<sup>1,2†</sup>, Haiping Liu<sup>4†</sup>, Jie Zhang<sup>1†</sup>, Bingjie Hu<sup>1</sup>, Chaowei Zhou<sup>1,2</sup>, Mengbin Xiang<sup>1</sup>, Yuejing Yang<sup>1,2</sup>, Mingrui Zhou<sup>1,2</sup>, Tingsen Jing<sup>1,2</sup>, Zhe Li<sup>1</sup>, Xinghua Zhou<sup>1,2</sup>, Guangjun Lv<sup>1,2</sup>, Wenping He<sup>1,2</sup>, Benhe Zeng<sup>4</sup>, Shijun Xiao<sup>3\*</sup>, Qinlu Li<sup>1\*</sup>, Hua Ye<sup>1,2\*</sup>

<sup>1</sup>Key Laboratory of Freshwater Fish Reproduction and Development (Ministry of Education), Southwest University College of Animal Sciences, Chongqing, 402460, China

<sup>2</sup>Key Laboratory of Aquatic Science of Chongqing 400175, China

<sup>3</sup> Department of Computer Science, Wuhan University of Technology, Wuhan, 430070, China

<sup>4</sup>Institute of Fisheries Science, Tibet Academy of Agricultural and Animal Husbandry Sciences, Lhasa 850000, China

S. Xiao (✉), e-mail: shijun\_xiao@163.com

Q. Li (✉), e-mail: lu\_8677@163.com

H. Ye (✉), e-mail: yhlh2000@126.com

† Hui Luo, Haiping Liu, and Jie Zhang contributed equally to this work

**Table S1 The euKaryotic Ortholog Groups (KOG) classification analysis of 49138 genes.**

| Class                                                         | Abbreviation | Gene Numbers | Ratio  |
|---------------------------------------------------------------|--------------|--------------|--------|
| Signal transduction mechanisms                                | T            | 7696         | 15.66% |
| General function prediction only                              | R            | 7271         | 14.80% |
| Posttranslational modification, protein turnover, chaperones  | O            | 5710         | 11.62% |
| Intracellular trafficking, secretion, and vesicular transport | U            | 3924         | 7.99%  |
| Carbohydrate transport and metabolism                         | G            | 3739         | 7.61%  |
| Cytoskeleton                                                  | Z            | 3400         | 6.92%  |
| Transcription                                                 | K            | 3002         | 6.11%  |
| Translation, ribosomal structure and biogenesis               | J            | 2535         | 5.16%  |
| RNA processing and modification                               | A            | 2360         | 4.80%  |
| Energy production and conversion                              | C            | 2319         | 4.72%  |
| Function unknown                                              | S            | 1910         | 3.89%  |
| Lipid transport and metabolism                                | I            | 1853         | 3.77%  |
| Inorganic ion transport and metabolism                        | P            | 1449         | 2.95%  |
| Amino acid transport and metabolism                           | E            | 1416         | 2.88%  |
| Cell cycle control, cell division. chromosome partitioning    | D            | 1300         | 2.65%  |
| Chromatin structure and dynamics                              | B            | 778          | 1.58%  |
| Nucleotide transport and metabolism                           | F            | 746          | 1.52%  |
| Secondary metabolites biosynthesis, transport and catabolism  | Q            | 740          | 1.51%  |
| Defense mechanisms                                            | V            | 695          | 1.41%  |
| Replication, recombination and repair                         | L            | 640          | 1.30%  |
| Extracellular structures                                      | W            | 580          | 1.18%  |
| Coenzyme transport and metabolism                             | H            | 519          | 1.06%  |
| Cell wall/membrane/envelope biogenesis                        | M            | 461          | 0.94%  |
| Nuclear structure                                             | Y            | 182          | 0.37%  |
| Cell motility                                                 | N            | 58           | 0.12%  |
| Unamed protein                                                | X            | 1            | 0.00%  |

**Table S2 Gene Ontology (GO) classification analysis of genes.**

| ## Total annotated genes: 63926 |                                                                |                    |             |
|---------------------------------|----------------------------------------------------------------|--------------------|-------------|
| #GO ID (Lev2)                   | GO Term (Lev2)                                                 | GO Term (Lev1)     | Gene Number |
| GO:0019012                      | virion                                                         | Cellular Component | 160         |
| GO:0044425                      | membrane part                                                  | Cellular Component | 18224       |
| GO:0044456                      | synapse part                                                   | Cellular Component | 317         |
| GO:0031974                      | membrane-enclosed lumen                                        | Cellular Component | 3151        |
| GO:0005623                      | cell                                                           | Cellular Component | 35769       |
| GO:0055044                      | symplast                                                       | Cellular Component | 1           |
| GO:0009295                      | nucleoid                                                       | Cellular Component | 9           |
| GO:0044422                      | organelle part                                                 | Cellular Component | 11910       |
| GO:0045202                      | synapse                                                        | Cellular Component | 411         |
| GO:0043226                      | organelle                                                      | Cellular Component | 23955       |
| GO:0030054                      | cell junction                                                  | Cellular Component | 1034        |
| GO:0044421                      | extracellular region part                                      | Cellular Component | 2407        |
| GO:0032991                      | macromolecular complex                                         | Cellular Component | 11156       |
| GO:0005576                      | extracellular region                                           | Cellular Component | 4117        |
| GO:0044423                      | virion part                                                    | Cellular Component | 160         |
| GO:0044217                      | other organism part                                            | Cellular Component | 4           |
| GO:0016020                      | membrane                                                       | Cellular Component | 20620       |
| GO:0044215                      | other organism                                                 | Cellular Component | 4           |
| GO:0099080                      | supramolecular complex                                         | Cellular Component | 1347        |
| GO:0044464                      | cell part                                                      | Cellular Component | 35766       |
| GO:0044699                      | single-organism process                                        | Biological Process | 33122       |
| GO:0023052                      | signaling                                                      | Biological Process | 8876        |
| GO:0001906                      | cell killing                                                   | Biological Process | 13          |
| GO:0032501                      | multicellular organismal process                               | Biological Process | 12783       |
| GO:0022414                      | reproductive process                                           | Biological Process | 437         |
| GO:0050789                      | regulation of biological process                               | Biological Process | 17827       |
| GO:0040011                      | locomotion                                                     | Biological Process | 2280        |
| GO:0032502                      | developmental process                                          | Biological Process | 12841       |
| GO:0071840                      | cellular component organization or biogenesis                  | Biological Process | 11958       |
| GO:0098743                      | cell aggregation                                               | Biological Process | 4           |
| GO:0048511                      | rhythmic process                                               | Biological Process | 120         |
| GO:0099531                      | presynaptic process involved in chemical synaptic transmission | Biological Process | 132         |
| GO:0000003                      | reproduction                                                   | Biological Process | 441         |
| GO:0048518                      | positive regulation of biological process                      | Biological Process | 4632        |
| GO:0065007                      | biological regulation                                          | Biological Process | 21584       |
| GO:0040007                      | growth                                                         | Biological Process | 1591        |

|            |                                                    |                    |       |
|------------|----------------------------------------------------|--------------------|-------|
| GO:0008152 | metabolic process                                  | Biological Process | 29816 |
| GO:0098754 | detoxification                                     | Biological Process | 28    |
| GO:0051179 | localization                                       | Biological Process | 11406 |
| GO:0050896 | response to stimulus                               | Biological Process | 14131 |
| GO:0009987 | cellular process                                   | Biological Process | 39021 |
| GO:0022610 | biological adhesion                                | Biological Process | 1361  |
| GO:0048519 | negative regulation of biological process          | Biological Process | 4303  |
| GO:0051704 | multi-organism process                             | Biological Process | 1502  |
| GO:0007610 | behavior                                           | Biological Process | 393   |
| GO:0002376 | immune system process                              | Biological Process | 3525  |
| GO:0003824 | catalytic activity                                 | Molecular Function | 23696 |
| GO:0060089 | molecular transducer activity                      | Molecular Function | 1699  |
| GO:0045182 | translation regulator activity                     | Molecular Function | 19    |
| GO:0005215 | transporter activity                               | Molecular Function | 4279  |
| GO:0005488 | binding                                            | Molecular Function | 33805 |
| GO:0001071 | nucleic acid binding transcription factor activity | Molecular Function | 1660  |
| GO:0016530 | metallochaperone activity                          | Molecular Function | 24    |
| GO:0005198 | structural molecule activity                       | Molecular Function | 2154  |
| GO:0016209 | antioxidant activity                               | Molecular Function | 205   |
| GO:0004871 | signal transducer activity                         | Molecular Function | 1923  |
| GO:0098772 | molecular function regulator                       | Molecular Function | 2697  |
| GO:0000988 | transcription factor activity, protein binding     | Molecular Function | 664   |

**Table S4 The hit homologs ratio between NGS-based transcriptome and PacBio-based transcriptome.**

| Fish                             | pacbio seq Number | hit to NGS | Ratio (%) | NGS seq number | hit to Pacbio | Ratio (%) | NCBI Transcriptome reference ID |
|----------------------------------|-------------------|------------|-----------|----------------|---------------|-----------|---------------------------------|
| <i>Gymnocypris namensis</i>      | 125396            | 121,535    | 96.921    | 84,464         | 61,196        | 72.452    | GHYH00000000                    |
| <i>Gymnocypris selincuoensis</i> | 125396            | 121,319    | 96.749    | 106,851        | 73,232        | 68.537    | GHYI00000000                    |
| <i>Gymnocypris przewalskii</i>   | 125396            | 121,567    | 96.946    | 78,762         | 58,744        | 74.584    | GHYJ00000000                    |
| <i>Gymnocypris eckloni</i>       | 125396            | 121,559    | 96.94     | 87,248         | 62,607        | 71.758    | GHYG00000000                    |

**Table S5 The proportion of NGS-based transcriptome of *Gymnocypris* species that are annotated by homology search against Genbank NR database.**

| Fish                             | NCBI Transcriptome reference ID | Term            | all sequence | NR annotated | Ratio (%) |
|----------------------------------|---------------------------------|-----------------|--------------|--------------|-----------|
| <i>Gymnocypris eckloni</i>       | GHYG000000000                   | all             | 87,248       | 34,800       | 39.89%    |
|                                  |                                 | PacBio hit*     | 62,607       | 32,167       | 51.38%    |
|                                  |                                 | PacBio not hit* | 24,641       | 2,633        | 10.69%    |
| <i>Gymnocypris przewalskii</i>   | GHYJ000000000                   | all             | 78,762       | 33,409       | 42.42%    |
|                                  |                                 | PacBio hit      | 58,744       | 31,144       | 53.02%    |
|                                  |                                 | PacBio not hit  | 20,018       | 2,265        | 11.31%    |
| <i>Gymnocypris namensis</i>      | GHYH000000000                   | all             | 84,464       | 34,572       | 40.93%    |
|                                  |                                 | PacBio hit      | 61,196       | 32,153       | 52.54%    |
|                                  |                                 | PacBio not hit  | 23,268       | 2,419        | 10.40%    |
| <i>Gymnocypris selincuoensis</i> | GHYI000000000                   | all             | 106,851      | 37,616       | 35.20%    |
|                                  |                                 | PacBio hit      | 73,232       | 34,847       | 47.58%    |
|                                  |                                 | PacBio not hit  | 33,619       | 2,769        | 8.24%     |

\* Pacbiohit and PacBio not hit represented homologs that were identified and unidentified among PacBio-based transcriptome of *G. namensis*, respectively.

**Table S6 Comparison with NGS-based transcriptome and PacBio-based transcriptome of *G. namensis***

| Statistics            | Novel transcriptome | Previous transcriptome* |
|-----------------------|---------------------|-------------------------|
| Transcript number     | 125,396             | 84,464                  |
| N50 (bp)              | 2,044               | 1,825                   |
| N90 (bp)              | 1,083               | 566                     |
| Mean (bp)             | 1,819               | 1,267                   |
| number $\geq$ 2,000bp | 41,248              | 14,864                  |
| Total length (bp)     | 228,095,655         | 107,087,800             |

\* The references for NGS-based transcriptome used for *G. namensis* was from the NCBI with accession numbers of GHYH00000000.

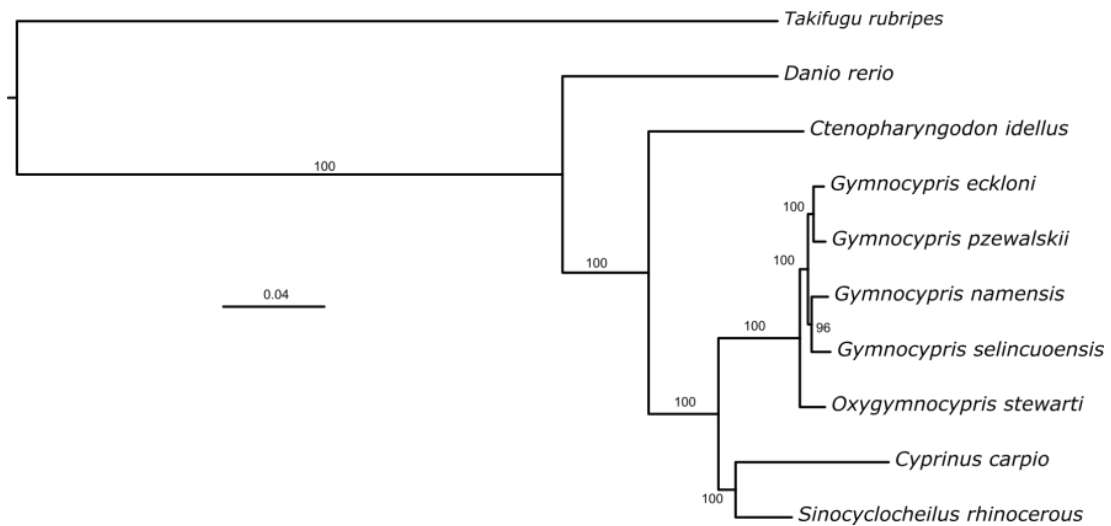

**Figure S1. Phylogenetic relationships of *Gymnocypris namensis*.**
